# Supplementary material for: Association of genetic disorders and congenital malformations with premature ovarian insufficiency: a nationwide register-based study
Source: PubMed Central journal article supplement — Hum Reprod. 2023 Apr 5;38(6):1224–30. doi: 10.1093/humrep/dead066 (PMC10233236; doi:10.1093/humrep/dead066), 2023-04-05
Supplement: dead066_supplementary_table_si.pdf [file dead066_supplementary_table_si.pdf]

human reproduction **SUPPLEMENTARY DATA**

**Supplementary Table S1 Diagnostic codes used in the analysis.**

|                                                                        | ICD10                                                                                                                                                                                         | ICD9                                           | ICD 8                                                       | Nomesco                                                 |
|------------------------------------------------------------------------|-----------------------------------------------------------------------------------------------------------------------------------------------------------------------------------------------|------------------------------------------------|-------------------------------------------------------------|---------------------------------------------------------|
| <b>Genetic and congenital malformation codes</b>                       |                                                                                                                                                                                               |                                                |                                                             |                                                         |
| <b>Autosome chromosomal abnormalities</b>                              | Q90                                                                                                                                                                                           | 7580                                           | 759.3                                                       |                                                         |
|                                                                        | Q91.0, Q91.1, Q91.2, Q91.3                                                                                                                                                                    | 7582                                           | 759.40                                                      |                                                         |
|                                                                        | Q91.4, Q91.5, Q91.6, Q91.7                                                                                                                                                                    | 7581                                           | 759.41                                                      |                                                         |
|                                                                        | Q92                                                                                                                                                                                           |                                                | 759.42                                                      |                                                         |
|                                                                        | Q93                                                                                                                                                                                           | 7583                                           |                                                             |                                                         |
|                                                                        | Q95                                                                                                                                                                                           | 7584, 7585                                     | 759.48                                                      |                                                         |
|                                                                        | Q99.8, Q99.9, Q87.11                                                                                                                                                                          |                                                |                                                             |                                                         |
| <b>Sex chromosome abnormalities (Turner excluded)</b>                  | Q99.0, Q99.1, Q99.2, Q87.10,                                                                                                                                                                  | 7588X                                          |                                                             |                                                         |
|                                                                        | Q97                                                                                                                                                                                           | 7588D                                          | 752.70, 752.69, 752.72, 759.52                              |                                                         |
|                                                                        | Q98                                                                                                                                                                                           | 7587, 7588B, 7588E, 7588D                      | 752.71, 759.51, 759.52, 759.53, 759.59                      |                                                         |
| <b>Skin and mammary gland anomalies</b>                                | Q80, q81, Q82, q84, Q85                                                                                                                                                                       | 7570, 7571, 7572, 7573, 7574, 7575, 7576, 7596 |                                                             | 757                                                     |
| <b>Congenital malformation syndromes due to known exogenous causes</b> | Q86                                                                                                                                                                                           |                                                |                                                             |                                                         |
| <b>Turner syndrome</b>                                                 | Q96                                                                                                                                                                                           | 7586                                           | 310.54, 311.54, 312.54, 313.54, 314.54, 315.54, 759.5       |                                                         |
| <b>Autosomal single-gene disorders</b>                                 | Q87.01, Q87.02, Q87.03, Q87.06, q87.4, Q87.13, Q87.14, Q87.15, Q87.16, Q87.17, Q87.18, Q87.20, Q87.21, Q87.22 Q87.23, Q87.25, Q87.27, Q87.30, Q87.31, Q87.81, Q87.82, Q87.83, Q87.84, Q87.86, | 7598a, 7598B, 7598C, 7597                      | 759.8 310.28, 311.28, 312.28, 313.28, 314.28, 315.28        | 759.80, 759.81, 759.82, 759.83, 759.84, 759.88, 759.99, |
| <b>Other chromosomal abnormalities</b>                                 | Q87.12, Q87.80                                                                                                                                                                                | 7589X                                          | 310.48, 311.48, 312.48, 313.48, 314.58, 315.48              |                                                         |
| <b>Unspecified congenital malformations</b>                            | Q87.04, Q87.8, Q87.24, Q87.26, Q87.88, Q89.3, Q89.4, Q89.7, Q89.8, Q89.9                                                                                                                      | 7598D, 7593, 7594, 7595, 7597, 7599, 7598      | 745.8, 758.9, 759.00, 759.1, 759.21, 759.28, 759.29, 759.60 |                                                         |
| <b>Congenital malformations of the nervous system</b>                  | Q00, Q01, Q02, Q03, Q04, Q05, Q06, Q07, Q87.05                                                                                                                                                | 740, 741, 742                                  | 740, 741, 742, 743                                          |                                                         |
| <b>Congenital malformations of the eye, ear, face, and neck</b>        | Q10, Q11, Q12, Q13, Q14, Q15, Q16, Q17, Q18, Q87.09                                                                                                                                           | 743, 744,                                      | 744, 745, 759.20                                            |                                                         |

(continued)

**Supplementary Table SI Continued**

|                                                                                    | <b>ICD10</b>                                                                                                          | <b>ICD9</b>       | <b>ICD 8</b>                    | <b>Nomesco</b> |
|------------------------------------------------------------------------------------|-----------------------------------------------------------------------------------------------------------------------|-------------------|---------------------------------|----------------|
| <b>Congenital malformations of the circulatory system</b>                          | Q20, Q21, Q22, Q23, Q24, Q25, Q26, Q27, Q28                                                                           | 745, 746, 747     | 746, 747                        |                |
| <b>Congenital malformations of the respiratory system</b>                          | Q30, Q31, Q32, Q33, Q34                                                                                               | 748               | 748                             |                |
| <b>Cleft lip and cleft palate</b>                                                  | Q35, Q36, Q37                                                                                                         | 749               | 749                             |                |
| <b>Other congenital malformations of the digestive system</b>                      | Q38, Q39, Q40, Q41, Q42, Q43, Q44, Q45                                                                                | 750, 751          | 750, 751                        |                |
| <b>Congenital malformations of the ovary, fallopian tubes, and broad ligaments</b> | Q50                                                                                                                   | 7520, 7521        | 752.54, 752.55, 752.56, 752.59, |                |
| <b>Congenital malformations of the uterus and cervix</b>                           | Q51                                                                                                                   | 7522, 7523, 7524, | 752.51, 752.52, 752.53          |                |
| <b>Other congenital malformations of female genitalia</b>                          | Q52                                                                                                                   | 7529              | 752.6, 752.61, 752.62, 752.69   |                |
| <b>Disorders of sexual differentiation or development</b>                          | Q56                                                                                                                   | 7588A, 7588C      | 752.0, 752.08                   |                |
| <b>Congenital malformations of the urinary system</b>                              | Q60, Q61, Q62, Q63, Q64                                                                                               | 753               | 753                             |                |
| <b>Congenital malformations and deformations of the musculoskeletal system</b>     | Q65, Q66, Q67, Q68, Q69, Q70, Q71, Q72, Q73, Q74, Q75, Q76, Q77, Q78, Q79, Q87.1, Q87.28, Q87.3, E34.3, Q87.5, Q87.38 | 754, 755, 756     | 754, 755, 756                   |                |
| <b>Congenital malformations of spleen</b>                                          | Q89.0                                                                                                                 | 7590              | 758.00, 758.01, 758.02, 758.09  |                |
| <b>Congenital malformations of endocrine glands</b>                                | Q89.1, Q89.2,                                                                                                         | 7591, 7592        | 758.10, 758.2, 758.3, 758.8     |                |
